# Supplementary material for: Cost-Effectiveness of Lifestyle-Related Interventions for the Primary Prevention of Breast Cancer: A Rapid Review
Source: PubMed Central journal article supplement (PMC7013088; doi:10.3389/fmed.2019.00325), 2020-02-05
Supplement: Table_1.pdf [file Table_1.pdf]

## *Supplementary Material*

**Supplementary Table 1** PubMed Search Strategy for primary prevention of breast cancer (2019 January)

| <b>Concept</b> | <b>Search terms</b>                                                                                                                                                                                                                                                                                                                               |
|----------------|---------------------------------------------------------------------------------------------------------------------------------------------------------------------------------------------------------------------------------------------------------------------------------------------------------------------------------------------------|
| Population     | <ol style="list-style-type: none"> <li>1. Breast neoplasms [MeSH Terms]</li> <li>2. Breast Neoplasm*[Title/Abstract]) OR Breast Cancer [Title/Abstract] OR Breast Tumor* [Title/Abstract] OR Breast Carcinom*[Title/Abstract] OR Breast (Breast* n3 neoplasm*[Title/Abstract] OR Cancer prevention[Title/Abstract])</li> <li>3. 1 OR 2</li> </ol> |
| Intervention   | <ol style="list-style-type: none"> <li>4. Primary Prevention [MeSH Terms]</li> <li>5. Diet [MeSH Terms]</li> <li>6. nutrition therapy [MeSH Terms]</li> <li>7. Diet, Reducing [MeSH Terms]</li> <li>8. Exercise [MeSH Terms]</li> <li>9. Physical Exertion [MeSH Terms]</li> <li>10. Drinking [MeSH Terms]</li> </ol>                             |

|         |                                                                                                                                                                                                                                                                                                                                                                                                                                                                                                                                                                                                                                                                                                                        |
|---------|------------------------------------------------------------------------------------------------------------------------------------------------------------------------------------------------------------------------------------------------------------------------------------------------------------------------------------------------------------------------------------------------------------------------------------------------------------------------------------------------------------------------------------------------------------------------------------------------------------------------------------------------------------------------------------------------------------------------|
|         | <p>11. Drinking Behavior[MeSH Terms]</p> <p>12. Tobacco Smoking[MeSH Terms]</p> <p>13. Primary prevention[Title/Abstract] OR Primary preventive [Title/Abstract] OR Prevention [Title/Abstract] OR education*[Title/Abstract] OR multifactorial [Title/Abstract] OR behavioral change [Title/Abstract] OR health promotion [Title/Abstract] OR counselling [Title/Abstract] OR diet*[Title/Abstract] OR nutrition*[Title/Abstract] OR exercise*[Title/Abstract] OR physical activity [Title/Abstract] OR alcohol [Title/Abstract] OR consumption [Title/Abstract] OR food [Title/Abstract] OR tobacco [Title/Abstract] OR lifestyle [Title/Abstract])</p> <p>14. 4 OR 5 OR 6 OR 7 OR 8 OR 9 OR 10 OR 11 OR 12 OR13</p> |
| Outcome | <p>15. Cost benefit analysis [MeSH Terms]</p> <p>16. Economics [MeSH Terms]</p> <p>17. Economic evaluation* [Title/Abstract] OR Cost-utility [Title/Abstract] OR Cost benefit [Title/Abstract] OR Cost analysis [Title/Abstract] OR Cost-effectiveness [Title/Abstract] OR Health evaluation [Title/Abstract] OR Cost* [Title/Abstract] OR Prices[Title/Abstract] OR pricing [Title/Abstract] OR Economic* [Title/Abstract] OR Qaly* [Title/Abstract] OR daly* [Title/Abstract] OR Value for money[Title/Abstract] OR Return on investment[Title/Abstract])</p> <p>18. 15 OR 16 OR 17</p>                                                                                                                              |
| Results | <p>19. 3 AND 14 AND 18</p>                                                                                                                                                                                                                                                                                                                                                                                                                                                                                                                                                                                                                                                                                             |

- |                                                                                                                                                                                                                                                                                                                                                                                                                                                                                                                                                                                                                                                                                                                                                           |
|-----------------------------------------------------------------------------------------------------------------------------------------------------------------------------------------------------------------------------------------------------------------------------------------------------------------------------------------------------------------------------------------------------------------------------------------------------------------------------------------------------------------------------------------------------------------------------------------------------------------------------------------------------------------------------------------------------------------------------------------------------------|
| <p>1. Breast neoplasms[MeSH Terms]<br/> 2. Breast Neoplasms[Title/Abstract] OR (Breast Cancer[Title/Abstract] OR Breast Tumor[Title/Abstract] OR Breast Tumors[Title/Abstract] OR Breast Carcinoma[Title/Abstract] OR Breast Carcinomas[Title/Abstract])) OR (Breast\$ adj3 neoplasm\$[Title/Abstract] OR Cancer prevention[Title/Abstract])<br/> 3. 1 OR 2 (<b>356705</b>)<br/> 4. Primary Prevention [MeSH Terms]<br/> 5. Diet [MeSH Terms]<br/> 6. nutrition therapy [MeSH Terms]<br/> 7. Diet, Reducing [MeSH Terms]<br/> 8. Exercise [MeSH Terms]<br/> 9. Physical Exertion [MeSH Terms]</p>                                                                                                                                                         |
| <p>10. Drinking [MeSH Terms]<br/> 11. Drinking Behavior[MeSH Terms]<br/> 12. Tobacco Smoking[MeSH Terms]<br/> 13. Primary prevention[Title/Abstract] OR Primary preventive[Title/Abstract] OR Prevention[Title/Abstract] OR education\$[Title/Abstract] OR multifactorial[Title/Abstract] OR behavioral change[Title/Abstract] OR health promotion[Title/Abstract] OR counselling [Title/Abstract] OR diet\$[Title/Abstract] OR nutrition\$[Title/Abstract] OR exercis\$[Title/Abstract] OR physical activity[Title/Abstract] OR alcohol[Title/Abstract] OR consumption[Title/Abstract] OR food[Title/Abstract] OR tobacco[Title/Abstract] OR lifestyle[Title/Abstract])<br/> 14. 4 or 5 or 6 or 7 or 8 or 9 or 10 or 11 or 12 or 13 (<b>2842133</b>)</p> |
| <p>15. Cost benefit analysis [MeSH Terms]<br/> 16. Economics[MeSH Terms]<br/> 17. Economic evaluation\$[Title/Abstract] OR Cost-utility[Title/Abstract] OR Cost benefit [Title/Abstract] OR Cost analysis[Title/Abstract] OR Cost-effectiveness[Title/Abstract] OR Health evaluation[Title/Abstract] OR Cost\$[Title/Abstract] OR Prices[Title/Abstract] OR pricing[Title/Abstract] OR Economic\$[Title/Abstract] OR Qaly[Title/Abstract] OR daly[Title/Abstract] OR Value for money[Title/Abstract] OR Return on investment[Title/Abstract])</p>                                                                                                                                                                                                         |
| <p><b>18. 15 or 16 or 17 (965425)</b><br/> <b>19. 3 AND 14 AND 18 (2844)</b></p>                                                                                                                                                                                                                                                                                                                                                                                                                                                                                                                                                                                                                                                                          |
