# Supplementary material for: Cost-Effectiveness of Lifestyle-Related Interventions for the Primary Prevention of Breast Cancer: A Rapid Review
Source: PubMed Central journal article supplement (PMC7013088; doi:10.3389/fmed.2019.00325), 2020-02-05
Supplement: Table_2.pdf [file Table_2.pdf]

## Supplementary Material

**Supplementary Table 2** Overall findings of the studies reviewed in terms of cost-effectiveness of primary prevention interventions

| Author, Year, Country                | Population and Setting                                                                                                                                                          | Intervention                                                                                                                                                              | Comparator/reference intervention             | Type of Economic evaluation & Data sources                                                                                                                                                       | Perspective of the study                                                                      | Price year, time horizon discount rate                                                                | Authors 'conclusions Cost / QALY, Cost/DALY                                                                                                                                                                                                  |
|--------------------------------------|---------------------------------------------------------------------------------------------------------------------------------------------------------------------------------|---------------------------------------------------------------------------------------------------------------------------------------------------------------------------|-----------------------------------------------|--------------------------------------------------------------------------------------------------------------------------------------------------------------------------------------------------|-----------------------------------------------------------------------------------------------|-------------------------------------------------------------------------------------------------------|----------------------------------------------------------------------------------------------------------------------------------------------------------------------------------------------------------------------------------------------|
| Annemans et al<br>2007, Belgium      | Community setting -fitness centre<br>Hypothetical cohort of 3 target populations (1)(2)(3)                                                                                      | Controlled and maintained <b>physical exercise</b>                                                                                                                        | Do nothing (current practice or "usual care") | Cost-Utility Analysis (CUA)<br>Six state transition Markov model (1) to (6), (1)healthy, (2) coronary heart disease (CHD), and (6) <b>breast cancer</b> . Model inputs from literature           | Public payer<br>Society perspective<br>Productivity loss associated with absenteeism included | No price year<br>25-year time horizon<br>3% discount rate (benefits and costs)                        | Incremental cost-utility ratio (ICUR) range based on public subsidy (0 or €500)<br>Cost-effective interventions, effects on several diseases, (uncertainty,probabilistic sensitivity analysis)                                               |
|                                      | (1)30 years, old, body mass index (BMI) 26, cholesterol 190, systolic blood pressure (SBP) 120                                                                                  | For cohort (1)                                                                                                                                                            |                                               |                                                                                                                                                                                                  |                                                                                               |                                                                                                       | Dominant to cost-effective                                                                                                                                                                                                                   |
|                                      | (2) 40 years, old, BMI 30 cholesterol 210, SBP 130                                                                                                                              | For cohort (2)                                                                                                                                                            |                                               |                                                                                                                                                                                                  |                                                                                               |                                                                                                       | Dominant to cost-effective                                                                                                                                                                                                                   |
|                                      | (3)50 years, old, BMI 32 cholesterol 250, SBP 140                                                                                                                               | For cohort (3)                                                                                                                                                            |                                               |                                                                                                                                                                                                  |                                                                                               |                                                                                                       | Dominant to cost-effective                                                                                                                                                                                                                   |
| Foster et al<br>(2011),<br>Australia | Secondary care setting. Target population: overweight or obese Australian adults aged 20 and above in 2003, assumed to be recruited via mass media campaigns and postal mailing | <b>Diet and exercise</b>                                                                                                                                                  |                                               | Cost-Effectiveness Analysis (CEA), Multistate life table Markov model<br>Among the nine obesity-related diseases, <b>breast cancer</b> was included<br>Model inputs from RCT & national database | Health sector<br>Travel costs &<br>Patient time                                               | AU dollars (AUD)<br>Price year 2003<br>100-year time horizon<br>3% discount rate (benefits and costs) | ICER range based on no inclusion and inclusion of travel costs and patient time, sensitivity analysis<br>ICER under AUD 50,000, only with health care costs for DASH. For diet alone, under for both<br>But only 0.1% obesity burden averted |
|                                      |                                                                                                                                                                                 | Dietary Approach to Stop Hypertension (DASH) including fruits & vegetables & and low fat and sugar and exercise program. Meeting with dieticians & exercise physiologists | No intervention                               |                                                                                                                                                                                                  |                                                                                               |                                                                                                       | Cost-effective to dominated                                                                                                                                                                                                                  |
|                                      |                                                                                                                                                                                 | A diet alone: education program of monthly meetings with dieticians.                                                                                                      | No intervention                               |                                                                                                                                                                                                  |                                                                                               |                                                                                                       | Cost-effective                                                                                                                                                                                                                               |

Supplementary Table 2 continued

| Author, Year, Country                                           | Population and Setting                                                                                                                                                                                                                                                | Intervention                                                                                                                                                                                               | Comparator/<br>reference<br>intervention                                                                                                                          | Type of Economic<br>evaluation & Data<br>sources                                                                                                                                                                                                                                                       | Perspective of the<br>study                                            | Price year,<br>time horizon,<br>discount rate                                                                                                       | Authors 'conclusions<br>Cost / QALY,<br>Cost/DALY                                                                                                                                                                      |
|-----------------------------------------------------------------|-----------------------------------------------------------------------------------------------------------------------------------------------------------------------------------------------------------------------------------------------------------------------|------------------------------------------------------------------------------------------------------------------------------------------------------------------------------------------------------------|-------------------------------------------------------------------------------------------------------------------------------------------------------------------|--------------------------------------------------------------------------------------------------------------------------------------------------------------------------------------------------------------------------------------------------------------------------------------------------------|------------------------------------------------------------------------|-----------------------------------------------------------------------------------------------------------------------------------------------------|------------------------------------------------------------------------------------------------------------------------------------------------------------------------------------------------------------------------|
| Roux et al<br>(2008), USA                                       | Community setting, various<br>locations for different physical<br>activity (PA). Adult population<br>aged 25 to 64 years, in 2004,<br>free of disease associated with<br>physical inactivity                                                                          | Five <b>physical activity (PA)</b><br>interventions                                                                                                                                                        |                                                                                                                                                                   | CEA, Flexible state<br>transition Markov<br>model simulation of<br>close cohort<br>(CHD, ischemic stroke,<br>type 2 diabetes, <b>breast</b><br>& colorectal <b>cancer</b> .<br>Model inputs from<br>literature & national<br>database                                                                  | Society perspective<br>Patient time included<br>WTP threshold:\$50,000 | Price year 2003<br>40-year time<br>horizon<br>3% discount rate<br>(costs)                                                                           | Cost-effective<br>Community intervention<br>strategies for PA<br>ICER sensitive to time<br>horizon, the shorter the<br>less cost-effective the<br>intervention<br>(probabilistic<br>sensitivity analysis)              |
|                                                                 |                                                                                                                                                                                                                                                                       | A six-year community health<br>education intervention (Stanford 5<br>City Project)                                                                                                                         | No intervention                                                                                                                                                   |                                                                                                                                                                                                                                                                                                        |                                                                        |                                                                                                                                                     | Cost-effective (50%<br>chance below \$50,000)                                                                                                                                                                          |
|                                                                 |                                                                                                                                                                                                                                                                       | An eight-week community<br>intervention for walking (Wheeling<br>Walks)                                                                                                                                    | No intervention                                                                                                                                                   |                                                                                                                                                                                                                                                                                                        |                                                                        |                                                                                                                                                     | Cost-effective                                                                                                                                                                                                         |
|                                                                 |                                                                                                                                                                                                                                                                       | Organized walking groups, social<br>events for promoting PA                                                                                                                                                | No intervention                                                                                                                                                   |                                                                                                                                                                                                                                                                                                        |                                                                        |                                                                                                                                                     | Cost-effective                                                                                                                                                                                                         |
|                                                                 |                                                                                                                                                                                                                                                                       | Initial training session for walking<br>program                                                                                                                                                            | No intervention                                                                                                                                                   |                                                                                                                                                                                                                                                                                                        |                                                                        |                                                                                                                                                     | Cost-effective                                                                                                                                                                                                         |
|                                                                 |                                                                                                                                                                                                                                                                       | Personal trainer intervention, &<br>financial incentives for PA                                                                                                                                            | No intervention                                                                                                                                                   |                                                                                                                                                                                                                                                                                                        |                                                                        |                                                                                                                                                     | Cost-effective                                                                                                                                                                                                         |
|                                                                 |                                                                                                                                                                                                                                                                       | Intensive lifestyle modification<br>program, for high risk diabetes 2<br>adults                                                                                                                            | No intervention                                                                                                                                                   |                                                                                                                                                                                                                                                                                                        |                                                                        |                                                                                                                                                     | Cost-effective                                                                                                                                                                                                         |
| Exposure to an environment<br>favoring a more active lifestyle. | No intervention                                                                                                                                                                                                                                                       | Cost-effective                                                                                                                                                                                             |                                                                                                                                                                   |                                                                                                                                                                                                                                                                                                        |                                                                        |                                                                                                                                                     |                                                                                                                                                                                                                        |
| Frew et al<br>(2014), UK                                        | Local city-run leisure centers<br>for city-dwelling adults in<br>Birmingham aged 16 to 70<br>years, as closed cohort for<br>simulation.<br>707 new participants aged 16<br>and over from nineteen council<br>centers in the Be Active<br>program, June to August 2010 | For <b>Be Active</b> participants of the<br>scheme: free access to fitness gyms<br>(induction session included),<br>swimming pools, and group fitness<br>classes at certain times of days and<br>weekends. | No intervention:<br>“usual care: paying<br>for access to leisure<br>centers”<br>For PA before<br>program, data from<br>the new enrolled Be<br>Active participants | CEA Markov model<br>simulation of close<br>cohort of the<br>Birmingham adults, all<br>healthy at start. <b>Breast</b><br><b>cancer</b> among 5<br>diseases. Model input<br>from natural<br>experiment and from<br>literature review<br><br>Cost-Benefit Analysis<br>(CBA): Willingness to<br>Pay (WTP) | Health care perspective<br>Society perspective                         | Price year<br>2009/2010<br>5 year and 2 to<br>10-year time<br>horizon for<br>sensitivity<br>analysis<br>3.5% discount<br>rate (benefits &<br>costs) | ICER range based on<br>time horizon 10 to 2<br>years Cost-effective<br>program (sensitivity<br>analysis) Cost (£)<br>/QALY range<br><br>Strongly dominant to<br>Cost-effective<br><br>Annual net benefit to<br>society |

Supplementary Table 2 continued

| Author, Year, Country           | Population and Setting                                                                                                                                                                                                                                                                                                                    | Intervention                                                                                                                                                                                                                                                                                               | Comparator/<br>reference<br>intervention                              | Type of Economic<br>evaluation & Data<br>sources                                                                                                                                                       | Perspective of the<br>study                                                                                          | Price year,<br>time horizon<br>discount rate                                                                                    | Authors 'conclusions<br>Cost / QALY,<br>Cost/DALY                                                                                                                                        |                     |                                                                                                                                            |
|---------------------------------|-------------------------------------------------------------------------------------------------------------------------------------------------------------------------------------------------------------------------------------------------------------------------------------------------------------------------------------------|------------------------------------------------------------------------------------------------------------------------------------------------------------------------------------------------------------------------------------------------------------------------------------------------------------|-----------------------------------------------------------------------|--------------------------------------------------------------------------------------------------------------------------------------------------------------------------------------------------------|----------------------------------------------------------------------------------------------------------------------|---------------------------------------------------------------------------------------------------------------------------------|------------------------------------------------------------------------------------------------------------------------------------------------------------------------------------------|---------------------|--------------------------------------------------------------------------------------------------------------------------------------------|
| Peels et al (2014), Netherlands | Communities of the Municipal Health Council regions participating in the study (2010-2011), same characteristics (i.e. urbanity, percentage of low and high socioeconomic status, and percentage of migrants) with participants assigned to one of the five interventions (RCT) 1,729 people aged over fifty recruited via direct mailing | Computer -tailored intervention <b>physical activity (PA)</b> intervention: tailored advice delivered to participants 3 times over four-month period, in four different versions, printed or web-based and with environment information (e.g. cycling routes, home exercises) or without (so-called basic) | Care as usual<br>Web-based versus printed<br>Environment versus basic | CEA, Chronic Disease Model: Markov state-transition model with several PA related chronic (CHD, stroke, diabetes, <b>breast cancer</b> & colon Cancer. Model inputs from the RCT and national database | Society perspective<br>Threshold WTP€20,000                                                                          | Price year 2011<br>5 year time horizon<br>4% discount rate for costs and 1.5% for benefits (0 used in the sensitivity analysis) | Preferred intervention: on long time horizon, printed intervention on a 5 year horizon, web-based intervention<br>Influence of time horizon 95% IC<br>Probabilistic sensitivity analysis |                     |                                                                                                                                            |
|                                 |                                                                                                                                                                                                                                                                                                                                           | Basic printed                                                                                                                                                                                                                                                                                              | Care as usual                                                         |                                                                                                                                                                                                        |                                                                                                                      |                                                                                                                                 | Cost-effective over lifetime and 5 years                                                                                                                                                 |                     |                                                                                                                                            |
|                                 |                                                                                                                                                                                                                                                                                                                                           | Printed environment                                                                                                                                                                                                                                                                                        | Basic printed                                                         |                                                                                                                                                                                                        |                                                                                                                      |                                                                                                                                 | Dominated                                                                                                                                                                                |                     |                                                                                                                                            |
|                                 |                                                                                                                                                                                                                                                                                                                                           | Web-based basic                                                                                                                                                                                                                                                                                            | Care as usual                                                         |                                                                                                                                                                                                        |                                                                                                                      |                                                                                                                                 | Cost-effective over lifetime & 5 years                                                                                                                                                   |                     |                                                                                                                                            |
|                                 |                                                                                                                                                                                                                                                                                                                                           | Web-based environment                                                                                                                                                                                                                                                                                      | Printed                                                               |                                                                                                                                                                                                        |                                                                                                                      |                                                                                                                                 | Not cost-effective over 5 years                                                                                                                                                          |                     |                                                                                                                                            |
| Bos et al (2011), USA           | Primary care setting: US Clinical centers for RCT 48,835 postmenopausal women aged 50 to 79 years and without prior cancer Eight years follow up. With two subgroups (1) (2)                                                                                                                                                              | Dietary intervention: dietary modification program Women health initiative Randomized Control Dietary Modification (VHI-DM).                                                                                                                                                                               |                                                                       | CEA, Markov cohort model. <b>Breast cancer</b> and ovarian cancer with five age cohorts (50y, 55y, 60y, 65y, 70y). Model inputs from literature & RCT                                                  | Society perspective<br>Health care payers (public and private)<br>Opportunity costs included<br>Threshold WTP€50,000 | Price year 2008<br>Lifetime horizon<br>3% discount rate                                                                         | Cost-effective strategies to prevent <b>breast</b> and <b>ovarian cancer from the societal perspective</b><br>95% IC below acceptable US threshold, sensitivity analysis                 |                     |                                                                                                                                            |
|                                 |                                                                                                                                                                                                                                                                                                                                           | (1) women with high fat intake at baseline >36.8%                                                                                                                                                                                                                                                          | Low-fat dietary intervention                                          |                                                                                                                                                                                                        |                                                                                                                      |                                                                                                                                 | Usual diet                                                                                                                                                                               | Society perspective | Cost-effective for all age start (50,55,60,65,70)                                                                                          |
|                                 |                                                                                                                                                                                                                                                                                                                                           |                                                                                                                                                                                                                                                                                                            |                                                                       |                                                                                                                                                                                                        |                                                                                                                      |                                                                                                                                 |                                                                                                                                                                                          | Health care payers  | Not cost-effective for private payers (age 50,55), cost-effective for Medicare (65,70)                                                     |
|                                 |                                                                                                                                                                                                                                                                                                                                           | (2) women with high risk of breast cancer with fat intake ≥32%                                                                                                                                                                                                                                             | Low-fat dietary intervention                                          |                                                                                                                                                                                                        |                                                                                                                      |                                                                                                                                 | Usual diet                                                                                                                                                                               | Society perspective | Cost-effective for all age start (50,55,60,65,70)<br>Not cost-effective for private payers (age 50,55) cost-effective for Medicare (65,70) |
|                                 |                                                                                                                                                                                                                                                                                                                                           |                                                                                                                                                                                                                                                                                                            |                                                                       |                                                                                                                                                                                                        | Health care payers                                                                                                   |                                                                                                                                 |                                                                                                                                                                                          |                     |                                                                                                                                            |
