# Supplementary material for: Cost-Effectiveness of Lifestyle-Related Interventions for the Primary Prevention of Breast Cancer: A Rapid Review
Source: PubMed Central journal article supplement (PMC7013088; doi:10.3389/fmed.2019.00325), 2020-02-05
Supplement: Table_3.pdf [file Table_3.pdf]

## Supplementary Material

**Supplementary Table 3** Estimated Incremental QALY required if the current Incremental cost were based on a \$50000 WTP threshold

|                  |                                                                                                                                             | Incremental cost | USD      | current Incremental QALY | Required incremental QALY for cost effective | Disease risk decrease with PA                         |
|------------------|---------------------------------------------------------------------------------------------------------------------------------------------|------------------|----------|--------------------------|----------------------------------------------|-------------------------------------------------------|
| Freew et al 2014 | Basce case analysis ( 5 years) Be active versus no scheme                                                                                   | 24               | 38       | 0,06                     | 0,00076                                      | 0.004(0.003,0.005)                                    |
|                  | Time horizon 2 years, be active versus no scheme                                                                                            | 92               | 146      | 0,05                     | 0,00292                                      |                                                       |
|                  | Reduction physical activity over time be active versus no scheme                                                                            | 63               | 100      | 0,03                     | 0,00126                                      |                                                       |
| Bos et al 2011   | Low fat dietary intervention women with high with high risk of breast cancer with fat intake $\geq 32\%$ , versus usual diet, start age 50y | 1003             | 1003     | 0,095                    | 0,02016**                                    | Cumulative Hasard ratio (HH) Year 8<br>0,778 (p<0.01) |
|                  | Low fat dietary intervention women with high fat intake at baseline >36.8% versus usual diet, start age 50y                                 | 1111             | 1111     | 0,086                    | 0,0222**                                     |                                                       |
|                  | Low fat dietary intervention women with high with high risk of breast cancer with fat intake $\geq 32\%$ , versus usual diet, start age 55y | 991              | 991      | 0,083                    | 0,01982**                                    |                                                       |
|                  | Low fat dietary intervention women with high fat intake at baseline >36.8% versus usual diet, start age 55y                                 | 1160             | 1160     | 0,075                    | 0,0232**                                     |                                                       |
|                  | Low fat dietary intervention women with high with high risk of breast cancer with fat intake $\geq 32\%$ , versus usual diet, start age 60y | 1100             | 1100     | 0,07                     | 0,022**                                      |                                                       |
| Roux et al 2008  | An eight-week community intervention for walking (Wheeling Walks) / NO                                                                      | 700              | 700      | 0,049                    | 0,014                                        | BC incidence decrease<br>15 to 58 per 100,000         |
| Peels et al 2014 | Computer -tailored PA intervention:Basic printed versus usual care, lifetime                                                                | 33E+07*          | 4,59E+08 | 44380*                   | 9174                                         | 0,003                                                 |
|                  | Computer -tailored PA intervention:Web-based basic versus usual care, lifetime                                                              | 9E+07*           | 1,25E+08 | 9150*                    | 2502                                         |                                                       |

\* cumulative lifetime

\*\*Incremental QALYs estimated by for breast cancer alone (Bos 2019, personal communication) were above the minimum required for \$50,000.
